# Supplementary material
Source: PubMed Central journal article supplement (PMC3072296)
Supplement: NIHMS88891-supplement-Supplementary_Data.pdf [file NIHMS88891-supplement-Supplementary_Data.pdf]

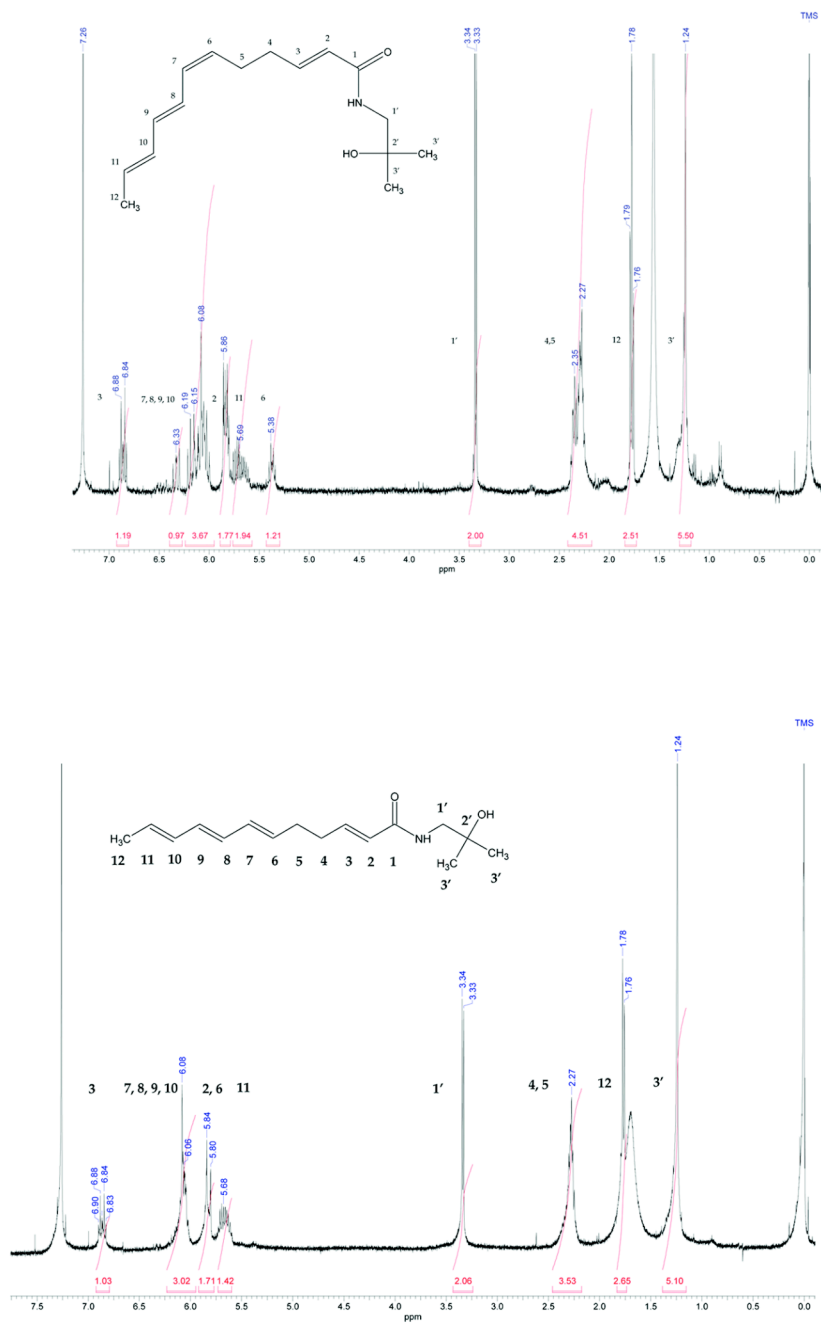

**Supplementary Figure 1** NMR spectra of hydroxy  $\alpha$ - and  $\beta$ -sanshool isomers. (**Top**) Hydroxy- $\alpha$ -sanshool (2E,6Z,8E,10E)-2'-hydroxyl-*N*-isobutyl-2,6,8,10-dodeca-tetraenamide) and (**bottom**) hydroxy- $\beta$ -sanshool (2E,6E,8E,10E)-2'-hydroxyl-*N*-isobutyl-2,6,8,10-dodeca-tetraenamide) were purified and <sup>1</sup>H spectra were recorded on a Varian 400 spectrometer at 400 MHz.

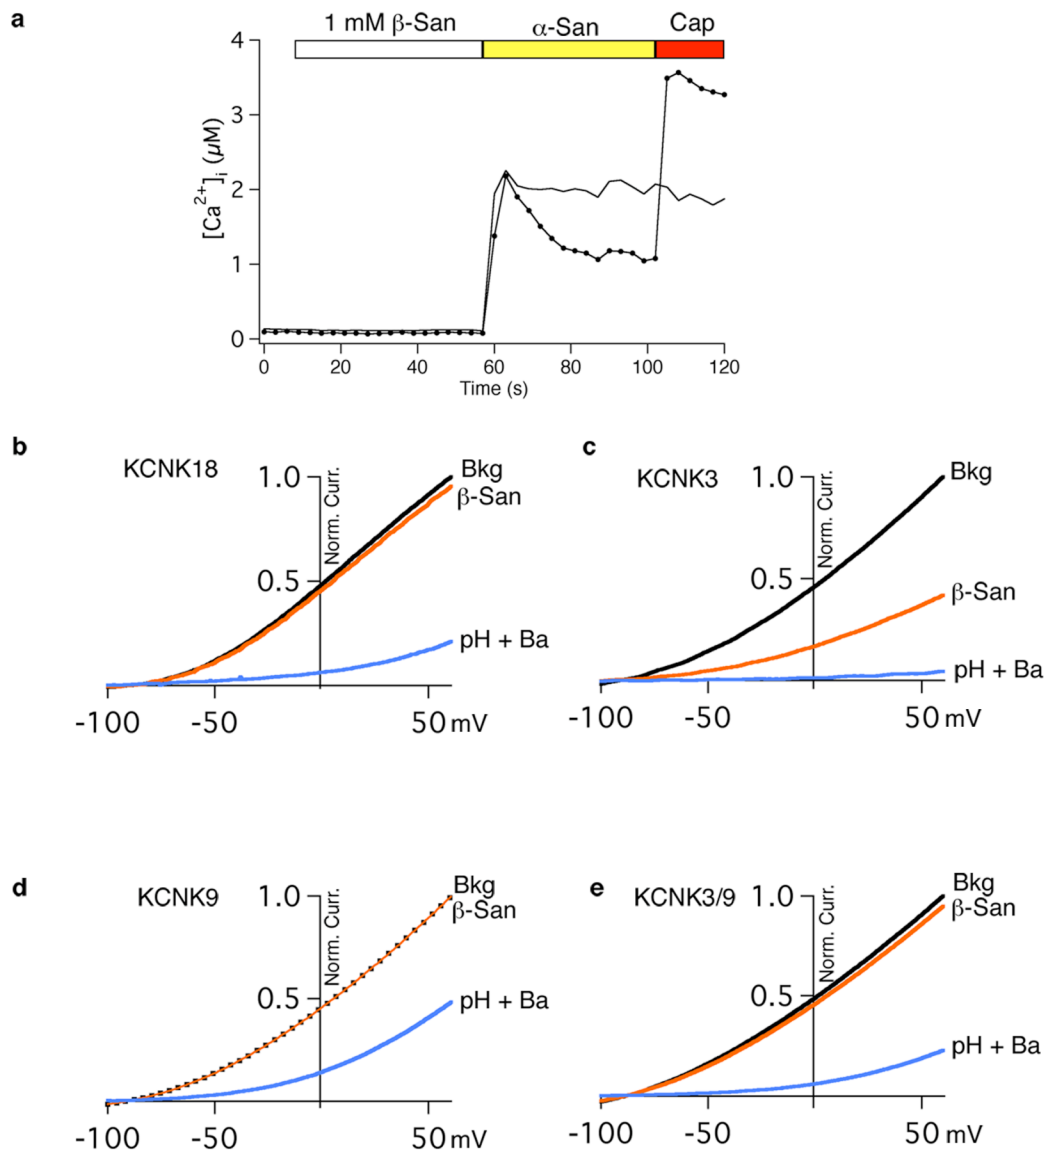

**Supplementary Figure 2** Hydroxy- $\beta$ -sanshool does not activate sensory neurons, but is a specific antagonist for KCNK3. **(a)** Representative calcium response of cultured sensory neurons to hydroxy- $\beta$ -sanshool (1 mM), hydroxy- $\alpha$ -sanshool (100  $\mu$ M), and capsaicin (1  $\mu$ M). **(b-e)** Representative traces of hydroxy- $\beta$ -sanshool-evoked (100  $\mu$ M; orange) inhibition of KCNK18, KCNK3, KCNK9, and KCNK3/9 heteromers (b-e, respectively) expressed in oocytes (holding potential = -80 mV, n=3-5). Inhibition by 2 mM BaCl<sub>2</sub> (pH = 6.5; blue).

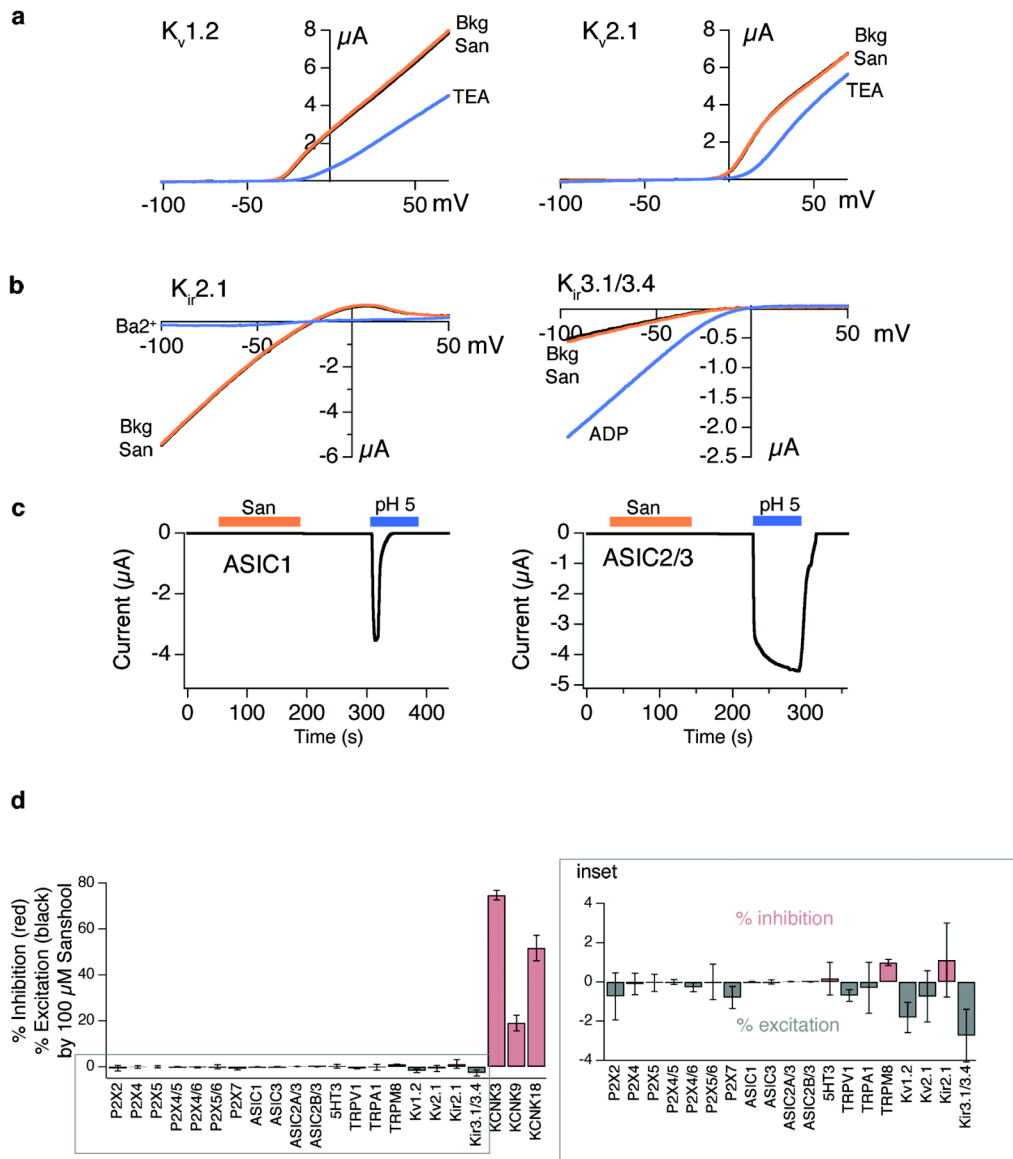

**Supplementary Figure 3** Sanshool does not effect a variety of ion channels expressed by sensory neurons. (a) Representative traces showing lack of sanshool sensitivity of  $K_v1.2$  (left) and  $K_v2.1$  (right; orange) (holding potential =  $-80$  mV,  $n=5$ ). Inhibition by TEA is shown for comparison (10 mM; blue). (b) Representative traces showing lack of sanshool sensitivity of  $K_{ir}2.1$  (left) and  $K_{ir}3.1/3.4$  co-expressed with P2Y<sub>12</sub> (right) (orange; holding potential =  $-80$  mV,  $n=5$ ). Inhibition of  $K_{ir}2.1$  by 1 mM  $BaCl_2$  and activation of  $K_{ir}3.1/3.4$  co-expressed with P2Y<sub>12</sub> by 10  $\mu M$  ADP are shown for comparison (blue). (c) Representative traces showing lack of sanshool-evoked (100  $\mu M$ ; orange) activation of ASIC1 (left) and ASIC2b/3 heteromer (right) (holding potential =  $-80$  mV,  $n=5$ ). Activation by ND96, pH 5.0 is shown for comparison (blue). (d) Summary showing effect of sanshool on a variety of ion channels expressed in *Xenopus* oocytes. Membrane currents were recorded in two-electrode voltage-clamp mode (holding potential =  $-60$  mV for all channels except  $K_v1.2$  and  $K_v2.1$  where holding potential =  $+30$  mV) and response to bath applied sanshool (100  $\mu M$ ) compared to activation (black) or inhibition (red) by the relevant agonist/antagonist (10 mM TEA for  $K_v1.2$  and  $K_v2.1$ , 1 mM  $BaCl_2$  for  $K_{ir}2.1$ , 10  $\mu M$  ADP for  $K_{ir}3.1/3.4$  co-expressed with P2Y<sub>12</sub>R, 100  $\mu M$  ATP for P2X channels, pH 5.0 for ASIC channels, 100  $\mu M$  serotonin for 5-HT<sub>3</sub>R-A channel, and 1  $\mu M$  capsaicin, 100  $\mu M$  mustard oil, or 100  $\mu M$  menthol for TRPV1, TRPA1, or TRPM8, respectively). 100  $\mu M$  sanshool was used for all experiments. Panel at left shows comparison with sanshool effects on KCNK channels; panel at right shows expanded scale view of data in box.

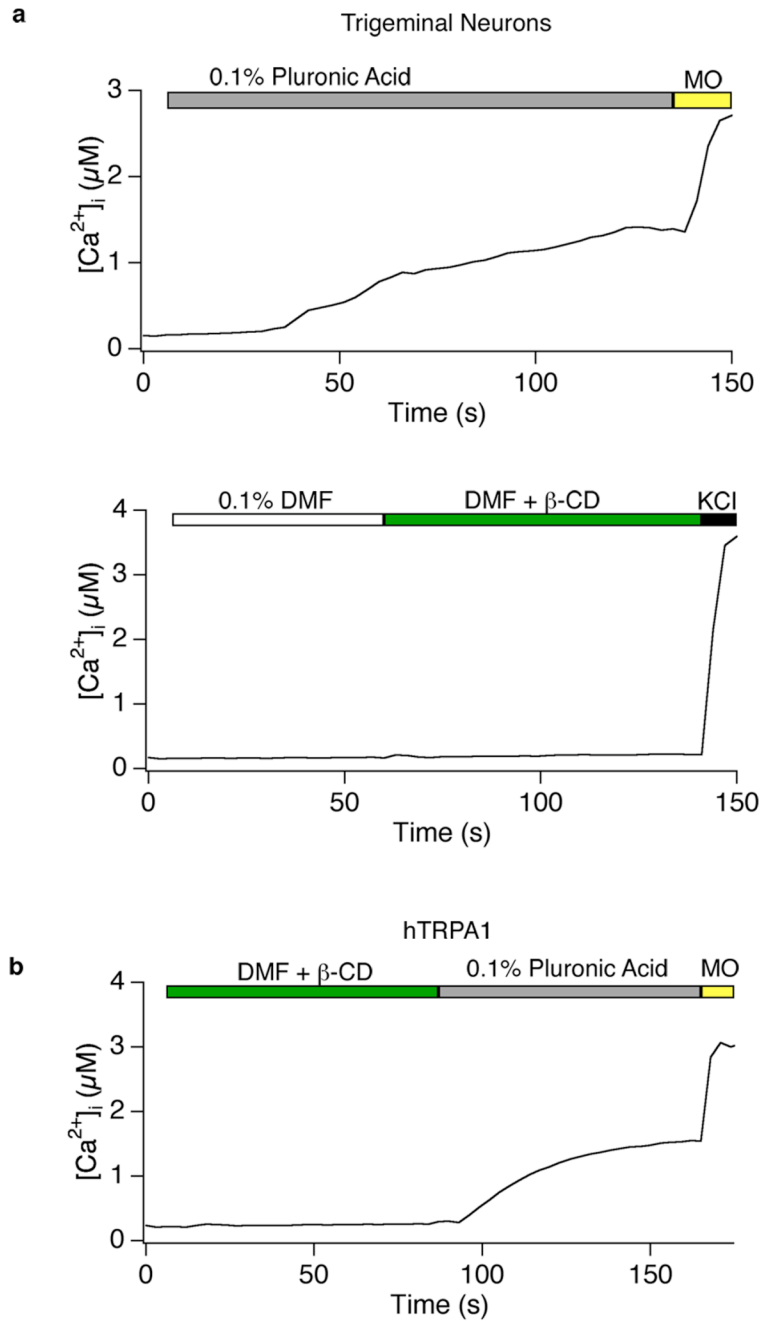

**Supplementary Figure 4** Pluronic activates endogenous and heterologous TRPA1. **(a)** Cultured trigeminal neurons show an increase in calcium in response to 0.1% pluronic acid (top; n=178), but not 0.1% dimethylformamide (DMF) or 0.1% DMF and 0.1 %  $\beta$ -cyclodextrin ( $\beta$ -CD)(bottom; n=167). **(b)** Human TRPA1 was transiently transfected into HEK293 cells. Calcium influx was observed in response 0.1% pluronic acid and mustard oil (100  $\mu M$ ), but not 0.1% DMF and 0.1 %  $\beta$ -CD (n=131).

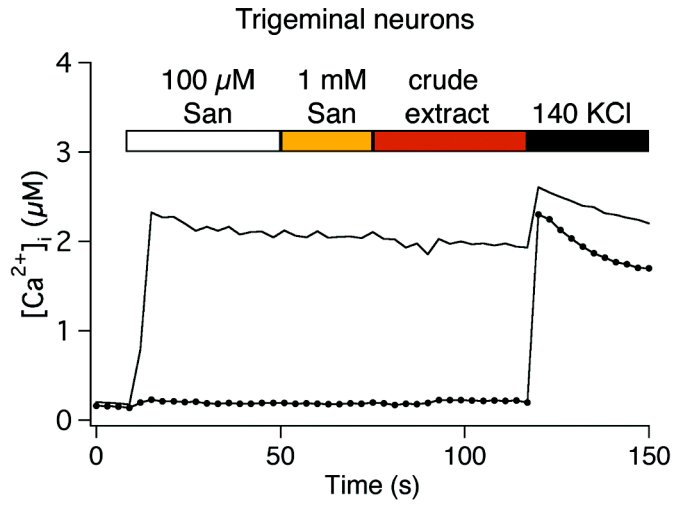

**Supplementary Figure 5** Crude Szechuan pepper extract and purified hydroxy- $\alpha$ -sanshool activate the same population of cultured sensory neurons. A representative calcium response of cultured sensory neurons to application of 100  $\mu$ M, then 1mM hydroxy- $\alpha$ -sanshool, followed by crude Szechuan pepper extract (3%).

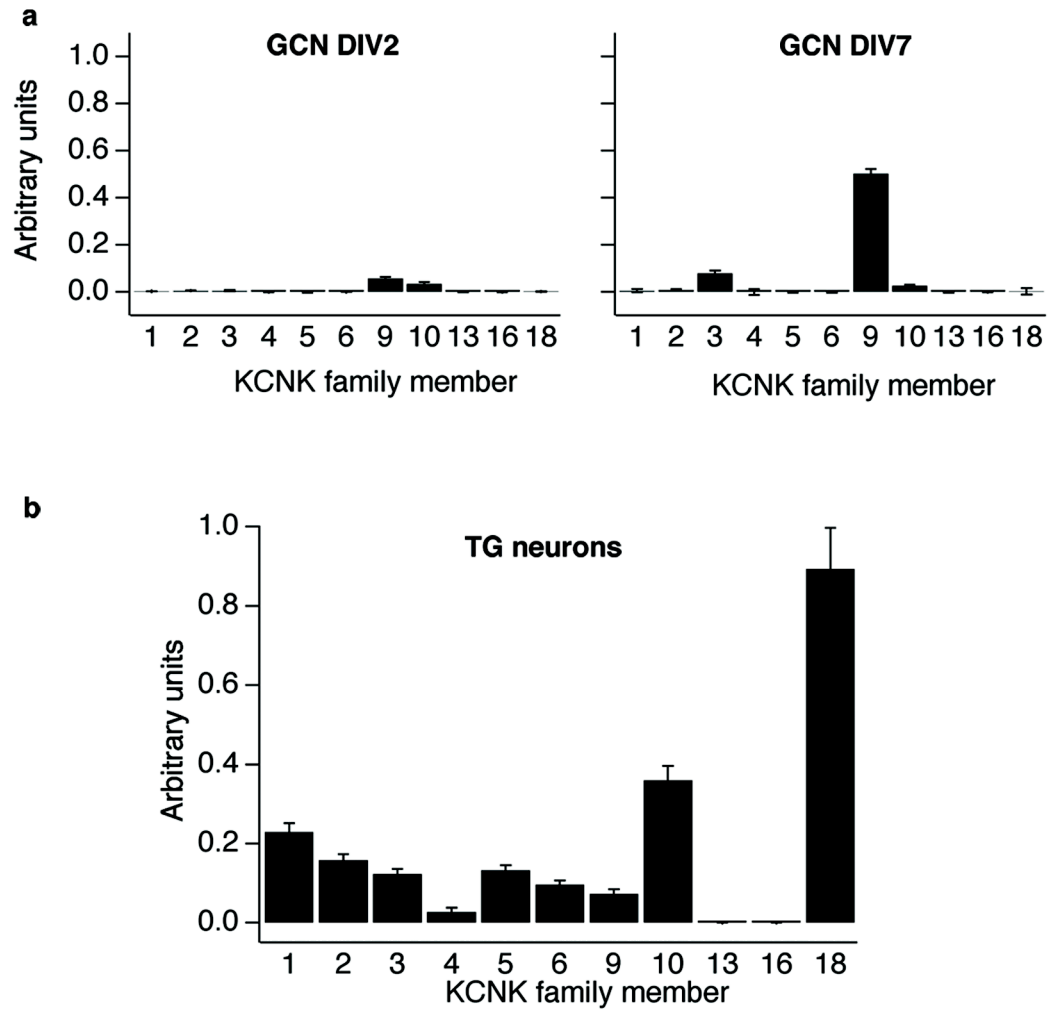

**Supplementary Figure 6** Quantitative PCR analysis of KCNK transcripts from cerebellar granule and trigeminal sensory neurons **(a)** Comparison of KCNK channel subtype expression in cerebellar granule neurons (CGN) on day 2 (left) versus day 7 (right) in culture (n=3 per condition). **(b)** KCNK channel subtype expression in trigeminal (TG) neurons (n=3).

| Primers sequences used to clone mouse KCNK gene coding regions |    |                                    |
|----------------------------------------------------------------|----|------------------------------------|
| KCNK1                                                          | 5' | ATGCTGCAGTCCCTGGCCGGCAGC           |
|                                                                | 3' | TCAGTGGTCTGCAGAGCCATCCTCATAGGG     |
| KCNK2                                                          | 5' | ATGCTTGCCAGCGCCTCGCGG              |
|                                                                | 3' | CTACTTGCCAGCGCCTCGCGG              |
| KCNK3                                                          | 5' | ATGAAGCGGCAGAATGTGCGCACGTTGG       |
|                                                                | 3' | TCACACCGAGCTCCTGCGCTTCATGAG        |
| KCNK4                                                          | 5' | ATGCGCAGCACCACTCCTGGCTCTG          |
|                                                                | 3' | CTACACCGGCACGGCCTTGTCTCGGAG        |
| KCNK5                                                          | 5' | ATGGTGGACCGGGGTCTTTACTCACC         |
|                                                                | 3' | TCACGTGCCCTGGGGTTATCTGCCTT         |
| KCNK9                                                          | 5' | ATGAAGCGGCAGAACGTGCGTACCC          |
|                                                                | 3' | TTAGATGGACTTGCGACGGAGGTGCAGCCTATG  |
| KCNK10                                                         | 5' | ATGAAATTTCCAATCGAGACGCCAAG         |
|                                                                | 3' | TTAGTTTCTGTCTTCAAGTAAAGAATTGTTCTCC |
| KCNK13                                                         | 5' | ATGGCTGGCCGCGGTTGCGG               |
|                                                                | 3' | CTACCTATCTCCACTGGTCTCTGCCAACCTG    |
| KCNK18                                                         | 5' | ATGGAGGCTGAGGAGCCACCTGAGGCC        |
|                                                                | 3' | TTACCAAGGTAGCGAACTTCCCTTTGGC       |

**Supplementary Table 1** - Specific primers designed to clone all functional KCNK family members. Primer sequences were designed to specific sections of the 5' and 3' ends of the coding regions of all known functional KCNK channels. PCR amplification was performed as described in **Methods**.

| Primer sequences used for qPCR experiments |    |                              |
|--------------------------------------------|----|------------------------------|
| KCNK1                                      | 5' | G TTCCTGTATACATTTCTACCCTCTTG |
|                                            | 3' | CATAATCTGTTTCAGGGGAGAGG      |
| KCNK2                                      | 5' | CACTGTGAGTTTTGCACATGG        |
|                                            | 3' | GGGACTGGACTTTTTCTGAATC       |
| KCNK3                                      | 5' | TGCTCGTGCCTCTGGTACA          |
|                                            | 3' | CGTGGACACCGAGCTGAT           |
| KCNK4                                      | 5' | CATCCAAAAAGCCTTCCAGA         |
|                                            | 3' | ATTTGGCAACCACTGGACTC         |
| KCNK5                                      | 5' | TTGCTGATTCAGGCACGTAG         |
|                                            | 3' | GAGAACCACATGCCAAACCT         |
| KCNK6                                      | 5' | TTGATGCTCTGCATGGCTAC         |
|                                            | 3' | TCCCCGTGTGACTTTCTAC          |
| KCNK9                                      | 5' | CTACTGGAGGGAGAAGTTGCGGAGA    |
|                                            | 3' | ACATCATCATCATCATCGTCATC      |
| KCNK10                                     | 5' | GCAGCTTTCCTTAGACCAG          |
|                                            | 3' | CCAGGGACATTCATTTTGGA         |
| KCNK13                                     | 5' | CTGTTTTGTGGCTTTCAGCA         |
|                                            | 3' | CCGCTATCCAGTTTCCTCAG         |
| KCNK16                                     | 5' | GTCTTCTGTGTCTTCTATGCTCTGAT   |
|                                            | 3' | AGAGATGGGGATTTTCTGTGATCTA    |
| KCNK18                                     | 5' | CTCTCTTCTCCGCTGTGCGAG        |
|                                            | 3' | AAGAGAGCGCTCAGGAAGG          |
| RPL19                                      | 5' | AGCCTGTGACTGTCCATTCC         |
|                                            | 3' | GGCAGTACCCTTCCTCTTCC         |

**Supplementary Table 2-** Specific primers used in qPCR experiments. Primers were designed to amplify a specific 100-250 base pair fragment of each known functional KCNK gene for use in qPCR experiments. qPCR experiments were performed as described in **Methods**.
